# Supplementary material for: Correlating tissue and plasma‑specific piRNA changes to predict their possible role in pancreatic malignancy and chronic inflammation
Source: PubMed Central journal article supplement — Biomed Rep. 2024 Oct 7;21(6):186. doi: 10.3892/br.2024.1874 (PMC11484194; doi:10.3892/br.2024.1874), 2024-10-07

Figure S1. Schematic overview of the data analysis methodology. pi, piwi-interacting; nt, nucleotide; KEGG, Kyoto Encyclopedia of Genes and Genomes.

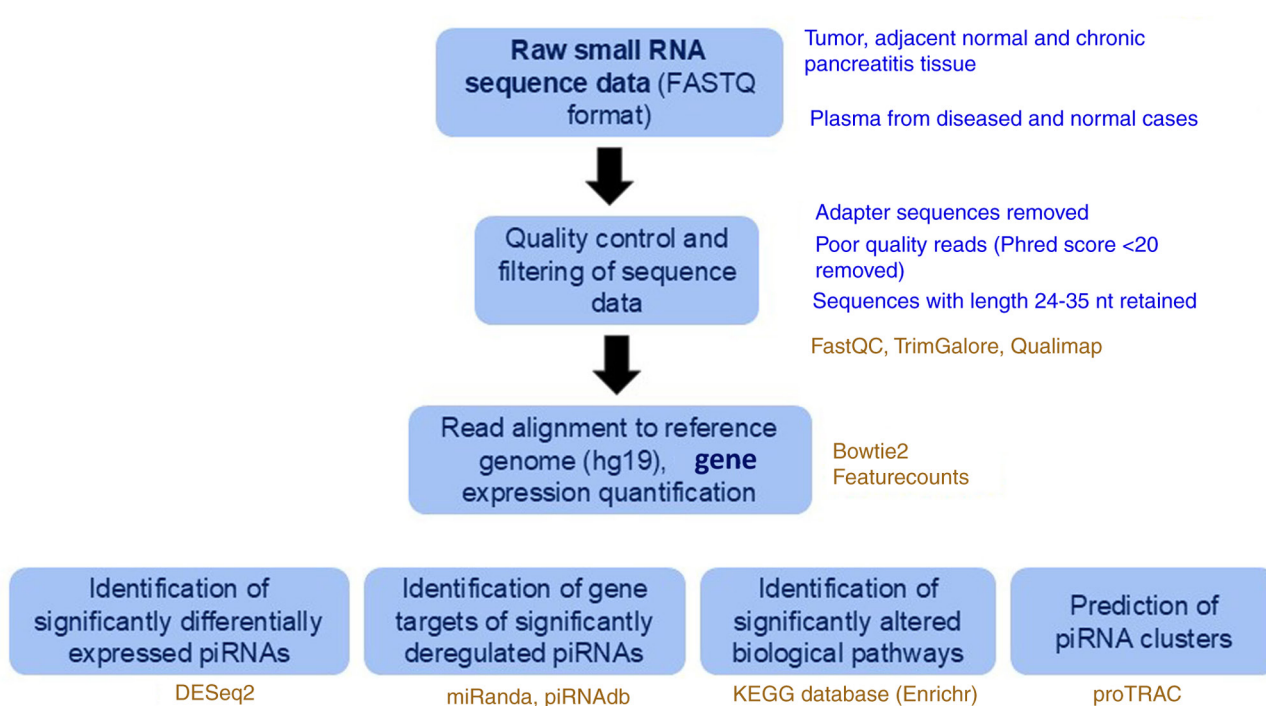

Figure S2. piRNA cluster visualization. Representative clusters obtained from (A) normal and (B) tumour plasma samples. pi, piwi-interacting RNA.

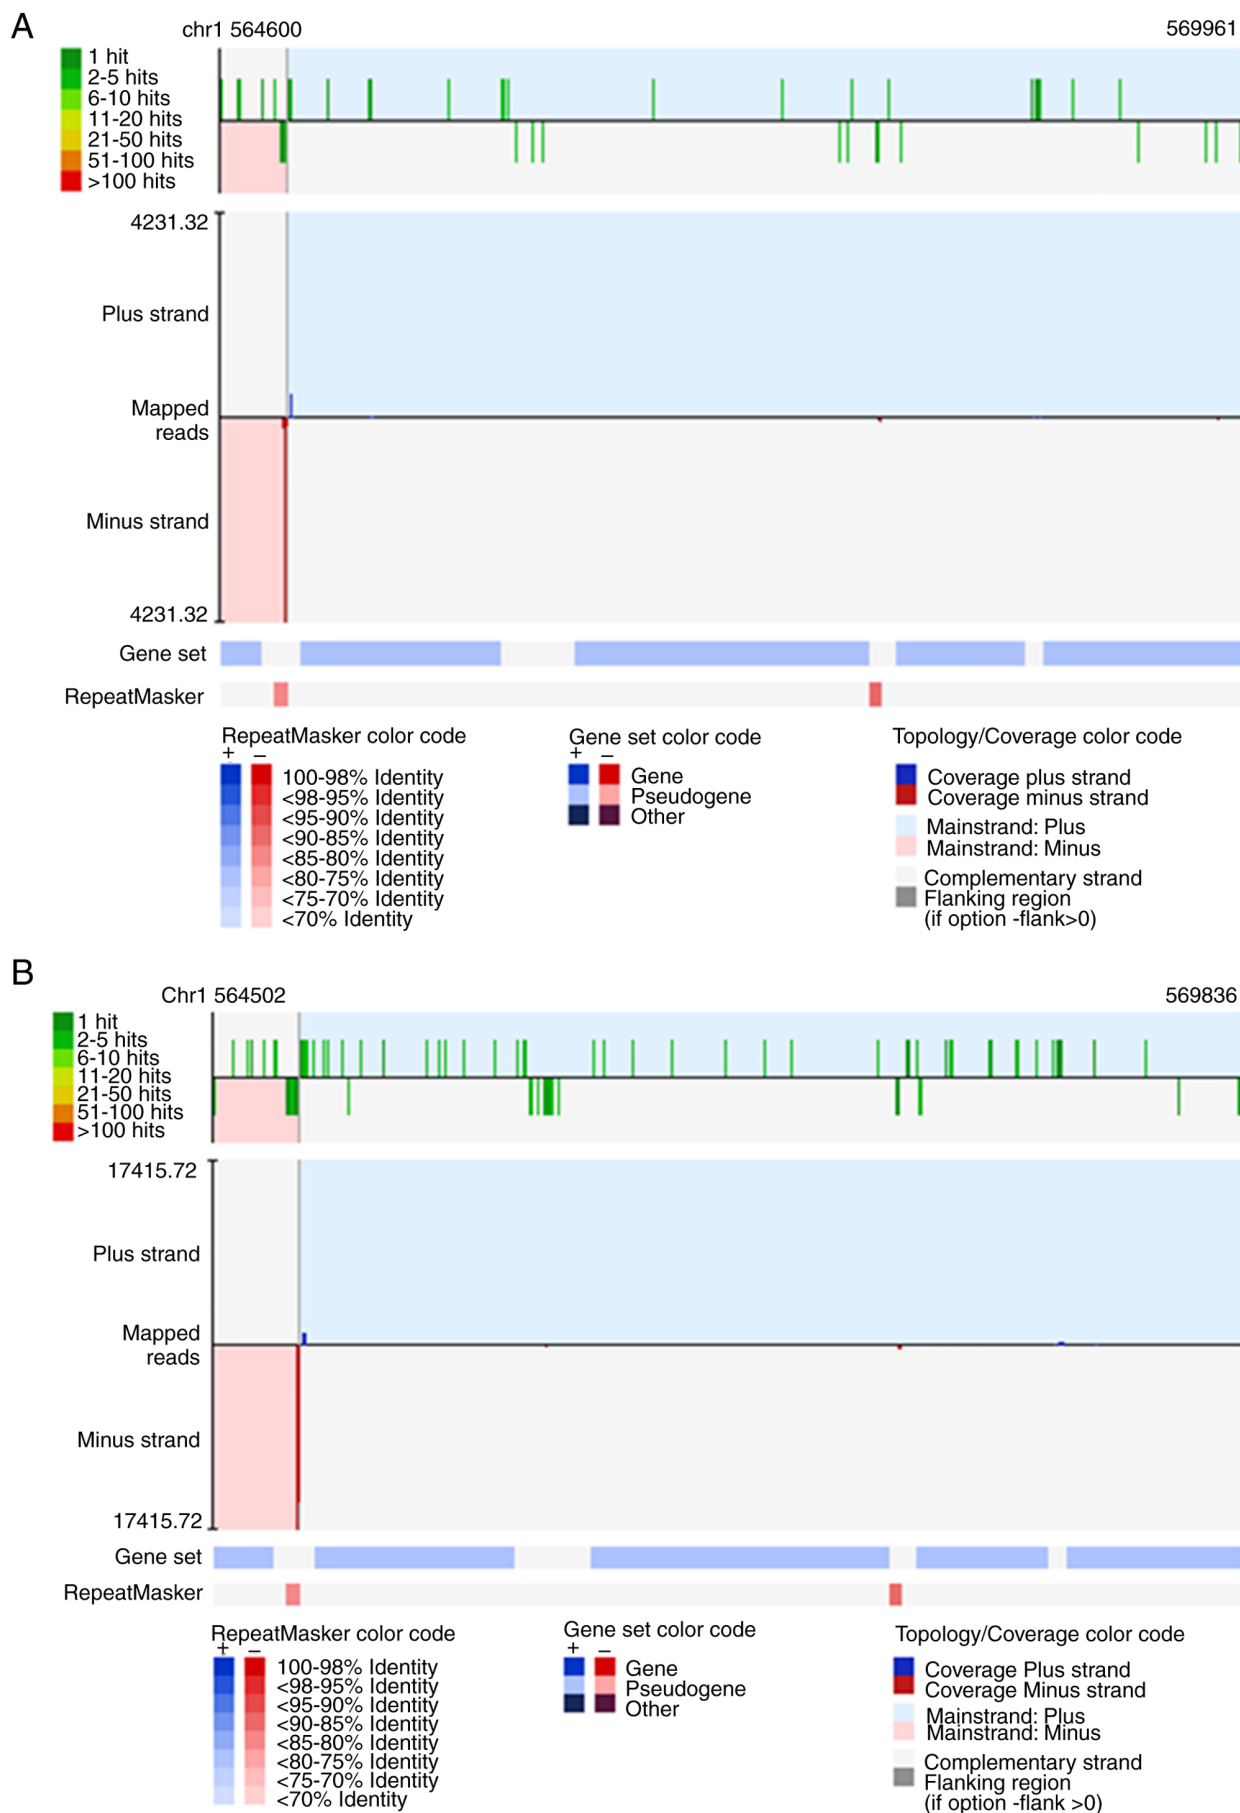

Figure S3. Expression of plasma-specific piRNAs in patients with CP and healthy individuals. (A) Heatmap showing expression patterns of piRNAs across all adjacent normal tissues (n=5) and tumour tissues (n=5). Higher expression is shown in blue and the lower expression is shown in red. (B) Volcano plot showing differentially expressed piRNAs in tissue from tumour and adjacent normal samples. pi, piwi-interacting; CP, chronic pancreatitis.

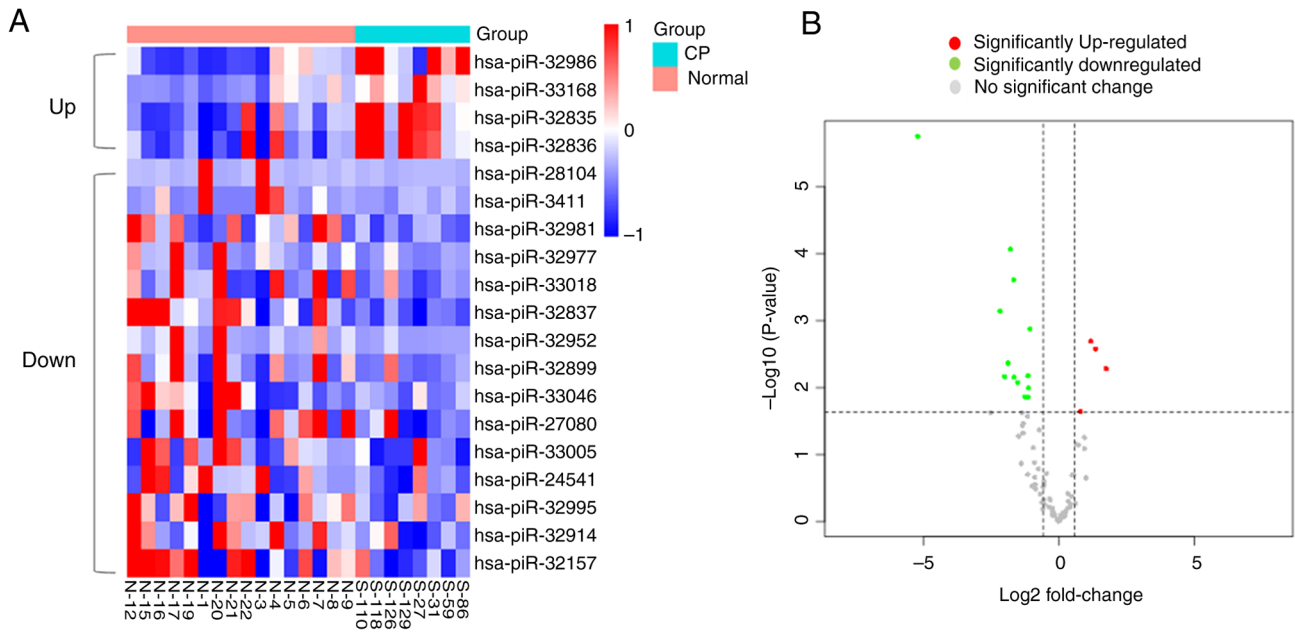

Supplement: Supplementary_Data1.pdf [file Supplementary_Data1.pdf]
