# Supplementary material for: Correlating tissue and plasma‑specific piRNA changes to predict their possible role in pancreatic malignancy and chronic inflammation
Source: PubMed Central journal article supplement — Biomed Rep. 2024 Oct 7;21(6):186. doi: 10.3892/br.2024.1874 (PMC11484194; doi:10.3892/br.2024.1874), 2024-10-07
Supplement: Supplementary_Data2.pdf [file Supplementary_Data2.pdf]

Table SI. Patient sample information.

| ID      | Sample type | Group  | Sex | Age, years | Tumour status                            |
|---------|-------------|--------|-----|------------|------------------------------------------|
| CN-1-T  | Tissue      | Tumour | F   | 43         | Well-differentiated adenocarcinoma       |
| S-113-T | Tissue      | Tumour | F   | 57         | Well-differentiated adenocarcinoma       |
| S-158-T | Tissue      | Tumour | F   | 48         | Well-differentiated adenocarcinoma       |
| S-166-T | Tissue      | Tumour | F   | 44         | Well-differentiated adenocarcinoma       |
| S-108-T | Plasma      | Tumour | M   | 48         | Well-differentiated adenocarcinoma       |
| CN-1    | Plasma      | Tumour | F   | 43         | Well-differentiated adenocarcinoma       |
| S-113   | Plasma      | Tumour | F   | 57         | Well-differentiated adenocarcinoma       |
| S-128-T | Plasma      | Tumour | M   | 48         | Well-differentiated adenocarcinoma       |
| S-133-T | Plasma      | Tumour | M   | 56         | Well-differentiated adenocarcinoma       |
| S-134-T | Plasma      | Tumour | M   | 60         | Well-differentiated adenocarcinoma       |
| S-156   | Plasma      | Tumour | F   | 42         | Moderately differentiated adenocarcinoma |
| S-158   | Plasma      | Tumour | F   | 48         | Well-differentiated adenocarcinoma       |
| S-161   | Plasma      | Tumour | F   | 64         | Well-differentiated adenocarcinoma       |
| S-42-T  | Plasma      | Tumour | M   | 21         | Moderately differentiated adenocarcinoma |
| S-44    | Plasma      | Tumour | F   | 70         | Well-differentiated adenocarcinoma       |
| S-45    | Plasma      | Tumour | F   | 50         | Moderately differentiated adenocarcinoma |
| S-52    | Plasma      | Tumour | F   | 46         | Moderately differentiated adenocarcinoma |
| S-61-T  | Plasma      | Tumour | F   | 45         | Well-differentiated adenocarcinoma       |
| S-71-T  | Plasma      | Tumour | F   | 32         | Well-differentiated adenocarcinoma       |
| N-12    | Plasma      | Normal | F   | 54         | Not applicable                           |
| N-15    | Plasma      | Normal | F   | 25         | Not applicable                           |
| N-16    | Plasma      | Normal | M   | 30         | Not applicable                           |
| N-17    | Plasma      | Normal | M   | 48         | Not applicable                           |
| N-19    | Plasma      | Normal | M   | 30         | Not applicable                           |
| N-1     | Plasma      | Normal | F   | 30         | Not applicable                           |
| N-20    | Plasma      | Normal | M   | 28         | Not applicable                           |
| N-21    | Plasma      | Normal | F   | 25         | Not applicable                           |
| N-22    | Plasma      | Normal | M   | 25         | Not applicable                           |
| N-3     | Plasma      | Normal | F   | 32         | Not applicable                           |
| N-4     | Plasma      | Normal | F   | 32         | Not applicable                           |
| N-5     | Plasma      | Normal | M   | 40         | Not applicable                           |

|         |        |        |   |    |                |
|---------|--------|--------|---|----|----------------|
| N-6     | Plasma | Normal | F | 40 | Not applicable |
| N-7     | Plasma | Normal | F | 46 | Not applicable |
| N-8     | Plasma | Normal | M | 34 | Not applicable |
| N-9     | Plasma | Normal | M | 50 | Not applicable |
| R-2-N   | Tissue | Normal | F | 50 | Not applicable |
| S-144-N | Tissue | Normal | M | 50 | Not applicable |
| S-156-N | Tissue | Normal | F | 42 | Not applicable |
| S-110   | Plasma | CP     | F | 32 | Not applicable |
| S-118   | Plasma | CP     | M | 47 | Not applicable |
| S-126   | Plasma | CP     | M | 57 | Not applicable |
| S-129   | Plasma | CP     | F | 22 | Not applicable |
| S-27    | Plasma | CP     | M | 19 | Not applicable |
| S-31    | Plasma | CP     | F | 21 | Not applicable |
| S-59    | Plasma | CP     | F | 20 | Not applicable |
| S-86    | Plasma | CP     | M | 27 | Not applicable |

---

M, male; F, female; CP, chronic pancreatitis.
