# Supplementary material for: Correlating tissue and plasma‑specific piRNA changes to predict their possible role in pancreatic malignancy and chronic inflammation
Source: PubMed Central journal article supplement — Biomed Rep. 2024 Oct 7;21(6):186. doi: 10.3892/br.2024.1874 (PMC11484194; doi:10.3892/br.2024.1874), 2024-10-07
Supplement: Supplementary_Data4.pdf [file Supplementary_Data4.pdf]

Table SIII. Differentially expressed piRNAs in normal and pancreatic cancer plasma samples

| A, Upregulated   |                                         |                  |                            |
|------------------|-----------------------------------------|------------------|----------------------------|
| piRNA            | Sequence                                | log2 fold-change | Adjusted P-value           |
| hsa-piR-32871    | 5'-AGGGTTCAGCTGTCTCTTACTTTTAACC-3'      | 1.598967653      | 6.3787644×10 <sup>-2</sup> |
| B, Downregulated |                                         |                  |                            |
| piRNA            | Sequence                                | log2 fold-change | Adjusted P-value           |
| hsa-piR-28104    | 5'-GGCTCTGTTGCGCAATGGATAGCGCAT-3'       | -4.658326726     | 6.05×10 <sup>-6</sup>      |
| hsa-piR-32981    | 5'-GTTTCATCCCACAGTGCCAGTTCTGCTTACCAA-3' | -2.786324352     | 2.11×10 <sup>-5</sup>      |
| hsa-piR-32977    | 5'-GTGGGCCACTTTTGGTAAGCAGAACTG-3'       | -2.869889242     | 8.39×10 <sup>-5</sup>      |
| hsa-piR-1961     | 5'-CAACAAGTACCGTAAGGGAAAGTTGA-3'        | -1.884680151     | 4.115474×10 <sup>-3</sup>  |
| hsa-piR-32895    | 5'-CAGGAATCCTAACCGCTAGACCATATGGGA-3'    | -1.519157702     | 4.0315134×10 <sup>-2</sup> |
| hsa-piR-32978    | 5'-GTTAATAAGTTCTGATAACCCACTAC-3'        | -1.431829867     | 5.5312852×10 <sup>-2</sup> |
| hsa-piR-775      | 5'-ACTGTGTGCTGATTGTCACGTTCTGATT-3'      | -3.312334043     | 8.446162×10 <sup>-2</sup>  |
| hsa-piR-25274    | 5'-TTGCTGTGATGACTATCTTAGGACACCTTTG-3'   | -2.02430795      | 8.446162×10 <sup>-2</sup>  |
| hsa-piR-12654    | 5'-CATTGATCATCGACACTTCGAACGCACTTG-3'    | -1.681657268     | 9.8917064×10 <sup>-2</sup> |
| hsa-piR-3411     | 5'-TCAGAAGATTCCAGGTTGACTCCTGGC-3'       | -2.373953951     | 9.8917064×10 <sup>-2</sup> |
