# Supplementary material for: Correlating tissue and plasma‑specific piRNA changes to predict their possible role in pancreatic malignancy and chronic inflammation
Source: PubMed Central journal article supplement — Biomed Rep. 2024 Oct 7;21(6):186. doi: 10.3892/br.2024.1874 (PMC11484194; doi:10.3892/br.2024.1874), 2024-10-07
Supplement: Supplementary_Data17.pdf [file Supplementary_Data17.pdf]

Table SXVI. Differentially expressed piRNAs found in normal and chronic pancreatitis plasma samples.

| A, Downregulated |                  |                  |                                      |
|------------------|------------------|------------------|--------------------------------------|
| piRNA            | log2 fold-change | Adjusted P-value | Sequence                             |
| hsa-piR-28104    | -5.211589017     | 0.00014307       | GGCTCTGTTGCGCAATGGATAGCGCAT          |
| hsa-piR-3411     | -2.511123591     | 0.099710478      | TCAGAAGATTCCAGGTTGACTCCTGGC          |
| hsa-piR-32981    | -2.166216052     | 0.014665261      | GTTCATCCCACAGTGCCAGTTCTGCTTACCAA     |
| hsa-piR-32977    | -1.997936879     | 0.047156218      | GTGGGCCACTTTTGGTAAGCAGAACTG          |
| hsa-piR-33018    | -1.880562581     | 0.043581872      | TGACATTCAGAGCACTGGGCAGAAAT           |
| hsa-piR-32837    | -1.773050912     | 0.003483707      | AACGAGACTCTGGCATGCTAACTAGTT          |
| hsa-piR-32952    | -1.669155677     | 0.006609237      | GGAAAGAAGACCCTGTTGAGCTTGACTCT        |
| hsa-piR-32899    | -1.66115871      | 0.047156218      | CATGAATGGATGAACGAGATTCCCACT          |
| hsa-piR-33046    | -1.518065793     | 0.0520629        | TTGTAAACACCACTGCACTCGGACCAGCC        |
| hsa-piR-27080    | -1.364818849     | 0.099710478      | GCAATAACAGGTCTGTGATGCCCTTAGA         |
| hsa-piR-33005    | -1.268984397     | 0.0695557        | TCCCTGGTGGTCTAGTGGCTAGGATT           |
| hsa-piR-24541    | -1.140606129     | 0.047156218      | TTCCCTGGTGGTCTAGTGGTTAGGATTCGGC      |
| hsa-piR-32995    | -1.137383509     | 0.0695557        | TAGTGGGTTATCAGAACTTATTAACA           |
| hsa-piR-32914    | -1.126521946     | 0.058728249      | CGGACAGGATTGACAGATTGATAGCT           |
| hsa-piR-32157    | -1.06824836      | 0.021655892      | CCCCACTGCTAAATTTGACTGGCT             |
| B, Upregulated   |                  |                  |                                      |
| piRNA            | log2 fold-change | Adjusted P-value | Sequence                             |
| hsa-piR-32986    | 1.749401443      | 0.046642196      | TAACAGGGGCCCTCTCAGCCCTCCTAATG        |
| hsa-piR-33168    | 1.345345402      | 0.030668819      | TATCATTGGTCGTGGTTGTAGTCCGTGCGAGAATAA |
| hsa-piR-32835    | 1.17277138       | 0.027506558      | AACATTCAACGCTGTCCGGTGAGTTTG          |
| hsa-piR-32836    | 0.792437884      | 0.099710478      | AACATTCATTGCTGTCCGGTGGGTTTG          |

pi, piwi-interacting.
